# Supplementary material for: The anti-apoptotic PON2 protein is Wnt/β-catenin-regulated and correlates with radiotherapy resistance in OSCC patients
Source: PubMed Central journal article supplement (PMC5239460; doi:10.18632/oncotarget.9013), 2016-04-26
Supplement: oncotarget-07-51082-s001.pdf [file oncotarget-07-51082-s001.pdf]

# The anti-apoptotic PON2 protein is Wnt/ $\beta$ -catenin-regulated and correlates with radiotherapy resistance in OSCC patients

## SUPPLEMENTARY FIGURES AND TABLE

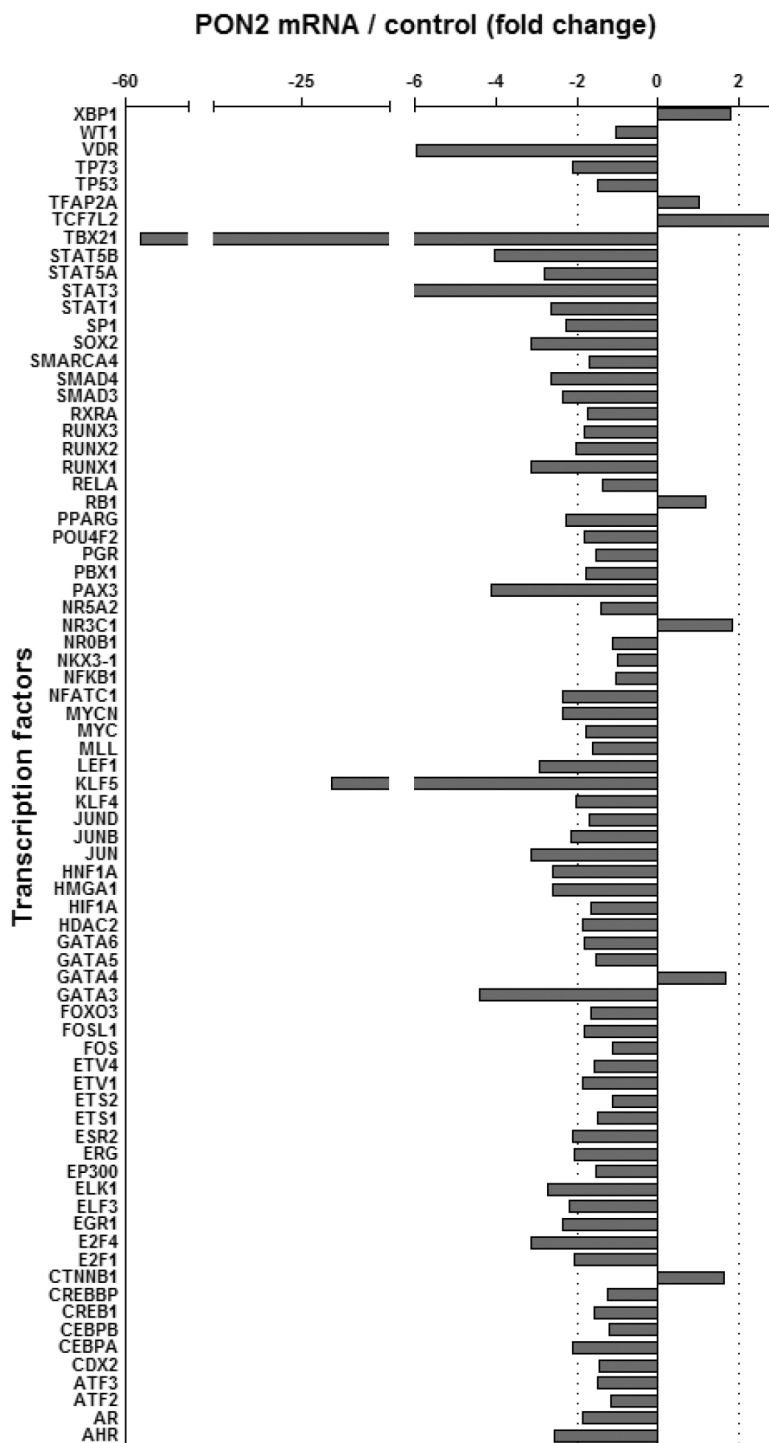

**Supplementary Figure S1: Identification of PON2 regulating transcription factors (TF) by knockdown analysis.** siRNA array of 76 TF in K562 cells. 3 days after transfection PON2 mRNA levels were quantified by qRT-PCR and normalized to GAPDH, mitochondrial ATP-Synthase 6 (mATPSy6) and RNA-Polymerase 2 (PolR2a).

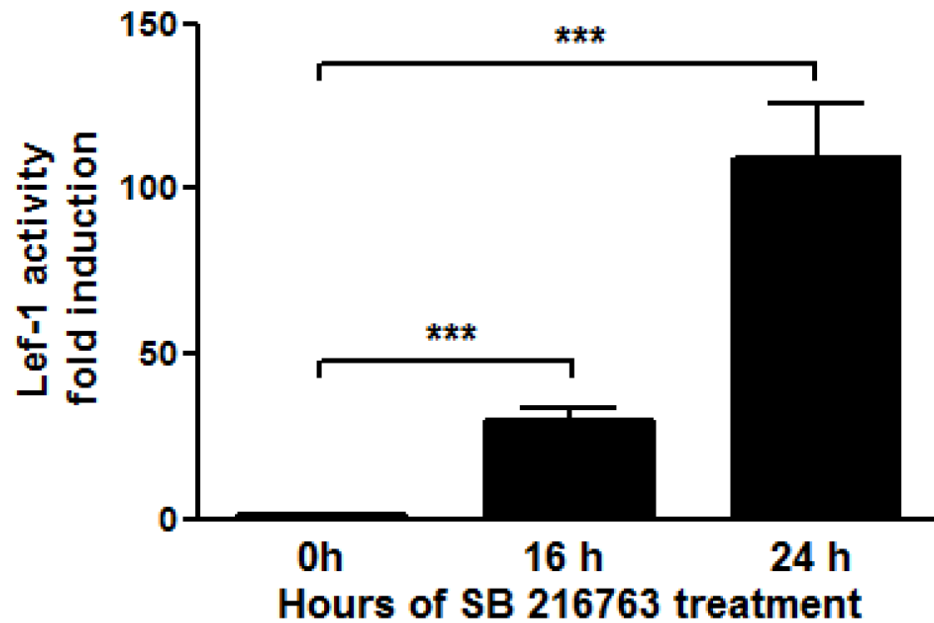

**Supplementary Figure S2: Induction of Lef-1 by GSK-3 $\beta$  inhibition.** K562 cells were co-transfected with plasmids encoding a firefly luciferase gene under the expressional control of the 7-LEF-fos-luc and a plasmid for constitutive expression of Renilla luciferase (normalization). At 4 h after transfection, cells were treated with SB216763 (25  $\mu$ M) for indicated times. Subsequently 7-LEF-fos-luc promoter induction was analyzed, normalized to Renilla luciferase activity and expressed as fold induction. Symbols represent mean  $\pm$  S.E.M. n = 2; \*\*\*P < 0.001.

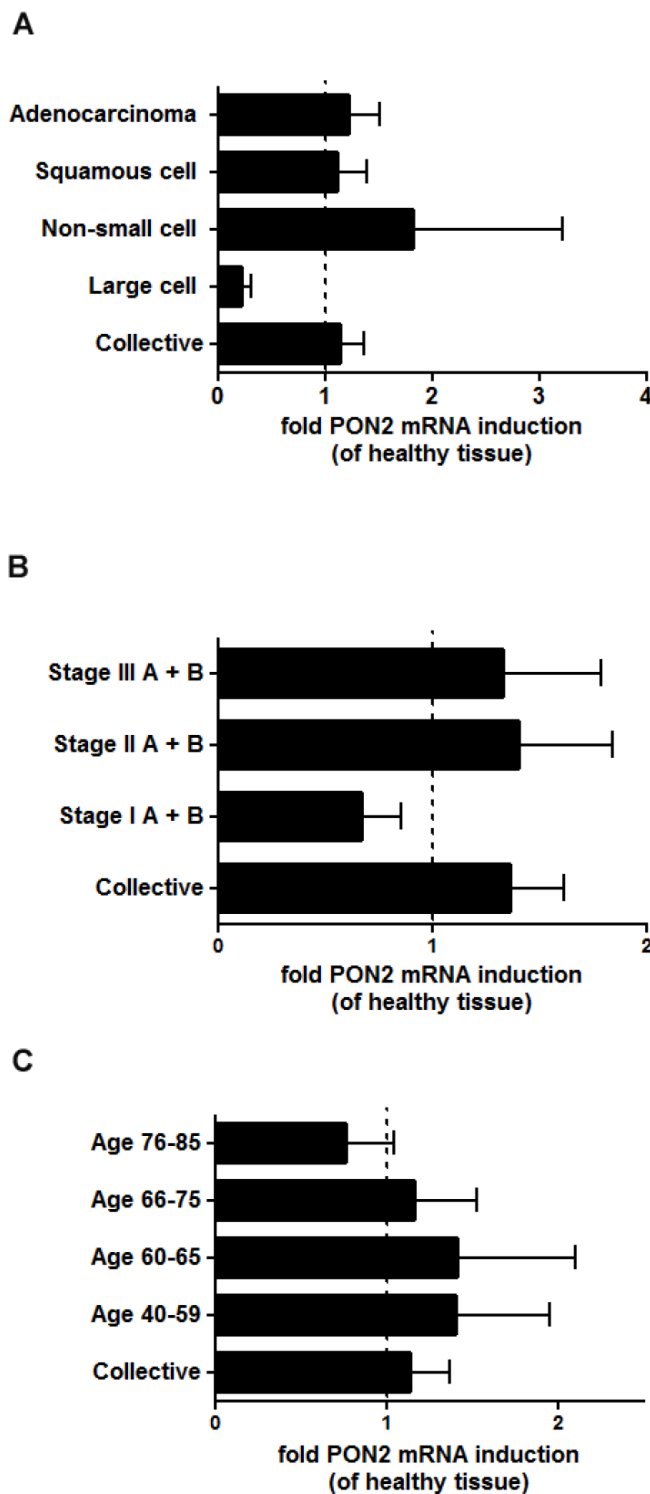

**Supplementary Figure S3: PON2 expression levels are unchanged in patients suffering from lung carcinoma.** PON2 mRNA expression levels were determined in 24 matched human lung cancer samples versus normal tissues from the same patient by qRT-PCR using TissueScan™ matched Lung Cancer Panel-IV array (Origene, Rockville, MD, USA) following the manufacturer’s instructions and normalized to GAPDH. The 24 samples were either summarized (‘collective’) or artificially separated into different groups of **A.** diagnosis, **B.** stage or **C.** age.

**Supplementary Table S1:**

See Supplementary File 1
